# Supplementary material
Source: PubMed Central journal article supplement (PMC3159699)
Supplement: NIHMS304848-supplement-supplement_1.pdf [file NIHMS304848-supplement-supplement_1.pdf]

Supplementary Table I

Sumoylation sites in  $\beta$ -arrestins, GRKs and 7TMRs.

| Protein Name       | Species             | Accession Number     | Residue Number    | Sequence     | SUMO Motif            |
|--------------------|---------------------|----------------------|-------------------|--------------|-----------------------|
| $\beta$ -arrestin1 | <i>Homo Sapiens</i> | NP 004032            | 294               | GKLVKED      | TypeI: $\Psi$ -K-X-E  |
|                    |                     |                      | 357               | PKPKKEEP     | TypeI: $\Psi$ -K-X-E  |
|                    |                     |                      | 400               | KGMKDDK      | TypeII: Non-consensus |
|                    |                     |                      | 403               | KDDKKEE      | TypeII: Non-consensus |
| $\beta$ -arrestin2 | <i>Homo Sapiens</i> | NP 004304            | 295               | GKLVKED      | TypeI: $\Psi$ -K-X-E  |
|                    |                     |                      | <i>Bos Taurus</i> | NM 001205277 | 295                   |
| 411                | KGLKDED             | TypeI: $\Psi$ -K-X-E |                   |              |                       |
| GRK2               | <i>Homo Sapiens</i> | NP 001610            | 90                | EEIKKYE      | TypeII: Non-consensus |
|                    |                     |                      | 94                | KYEKLET      | TypeII: Non-consensus |
|                    |                     |                      | 644               | VQWKEL       | TypeI: $\Psi$ -K-X-E  |
| GRK3               | <i>Homo Sapiens</i> | NP 005151            | 90                | EEIKKYE      | TypeII: Non-consensus |
|                    |                     |                      | 644               | VQWKEL       | TypeI: $\Psi$ -K-X-E  |
| GRK4               | <i>Homo Sapiens</i> | NP 892027            | 134               | LGLKEEN      | TypeI: $\Psi$ -K-X-E  |
|                    |                     |                      | 227               | KKRKGEA      | TypeII: Non-consensus |
|                    |                     |                      | 314               | RDLKPEN      | TypeI: $\Psi$ -K-X-E  |
|                    |                     |                      | 394               | EKVKWEE      | TypeI: $\Psi$ -K-X-E  |
|                    |                     |                      | 403               | QRIKNDT      | TypeII: Non-consensus |
| GRK5               | <i>Homo Sapiens</i> | CAI15804             | 527               | DINKSES      | TypeII: Non-consensus |
|                    |                     |                      | 226               | KKRKGES      | TypeII: Non-consensus |

|                    |                     |              |     |         |                       |
|--------------------|---------------------|--------------|-----|---------|-----------------------|
|                    |                     |              | 313 | RDLKPEN | TypeI: $\Psi$ -K-X-E  |
|                    |                     |              | 393 | EKVKREE | TypeI: $\Psi$ -K-X-E  |
| GRK6               | <i>Homo Sapiens</i> | NP_001004106 | 226 | KKRKGEA | TypeII: Non-consensus |
|                    |                     |              | 313 | RDLKPEN | TypeI: $\Psi$ -K-X-E  |
|                    |                     |              | 358 | EVVKNER | TypeI: $\Psi$ -K-X-E  |
|                    |                     |              | 393 | KKIKREE | TypeI: $\Psi$ -K-X-E  |
|                    |                     |              | 466 | PPFKPDP | TypeII: Non-consensus |
| $\beta_2$ AR       | <i>Homo Sapiens</i> | P07550       | 60  | AIAKFER | TypeI: $\Psi$ -K-X-E  |
|                    |                     |              | 227 | QEAKRQL | TypeII: Non-consensus |
|                    |                     |              | 232 | QLQKIDK | TypeII: Non-consensus |
|                    |                     |              | 235 | KIDKSEG | TypeII: Non-consensus |
| $\beta_1$ AR       | <i>Homo Sapiens</i> | P08588       | 85  | AIAKTPR | TypeII: Non-consensus |
|                    |                     |              | 253 | EAQKQVK | TypeII: Non-consensus |
|                    |                     |              | 476 | SESKV   | TypeII: Non-consensus |
| $\alpha_1$ AR      | <i>Homo Sapiens</i> | NP_000672    | 80  | RALKAPQ | TypeII: Non-consensus |
| AT <sub>1a</sub> R | <i>Homo Sapiens</i> | ABY87526     |     |         | No sites predicted    |
| V <sub>2</sub> R   | <i>Homo Sapiens</i> | ACR39021     |     |         | No sites predicted    |

(Sites were identified by sequence analysis with the software SUMOsp 2.0: Systematic study of protein sumoylation: Development of a site-specific predictor of SUMOsp 2.0. Proteomics.2009; 9:3409-3412)
